# Supplementary material for: Altered blood gene expression in the obesity-related type 2 diabetes cluster may be causally involved in lipid metabolism: a Mendelian randomisation study
Source: PubMed Central journal article supplement (PMC10163084; doi:10.1007/s00125-023-05886-8), 2023-02-24
Supplement: 125_2023_5886_MOESM1_ESM.pdf [file 125_2023_5886_MOESM1_ESM.pdf]

## SUPPLEMENTARY DATA

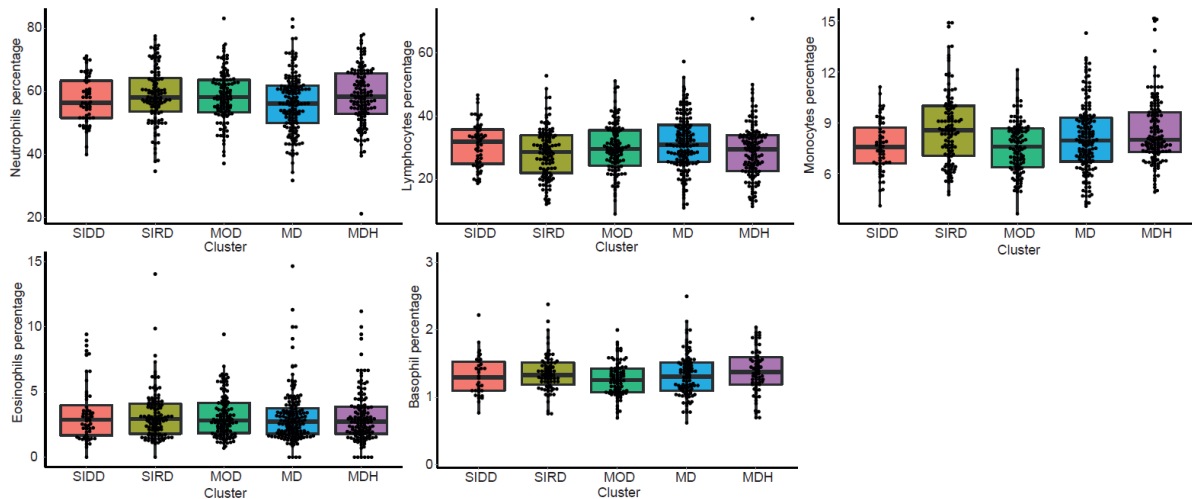

**ESM Fig. 1 Percentage of white blood cells in blood of individuals in the five clusters of T2D.**

Percentage of neutrophils, lymphocytes, monocytes, eosinophils and basophils in blood of individuals with T2D in the five clusters: SIDD, SIRD, MOD, MD and MDH

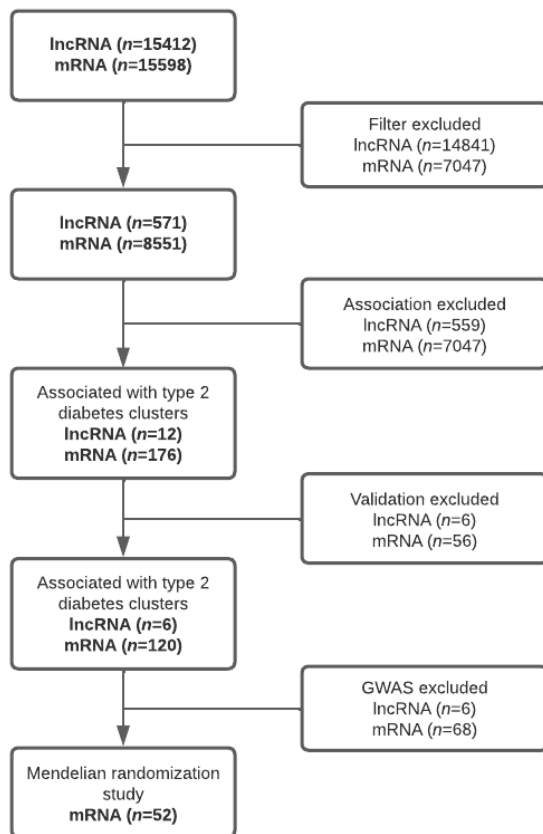

**ESM Fig. 2 Overview of the study**

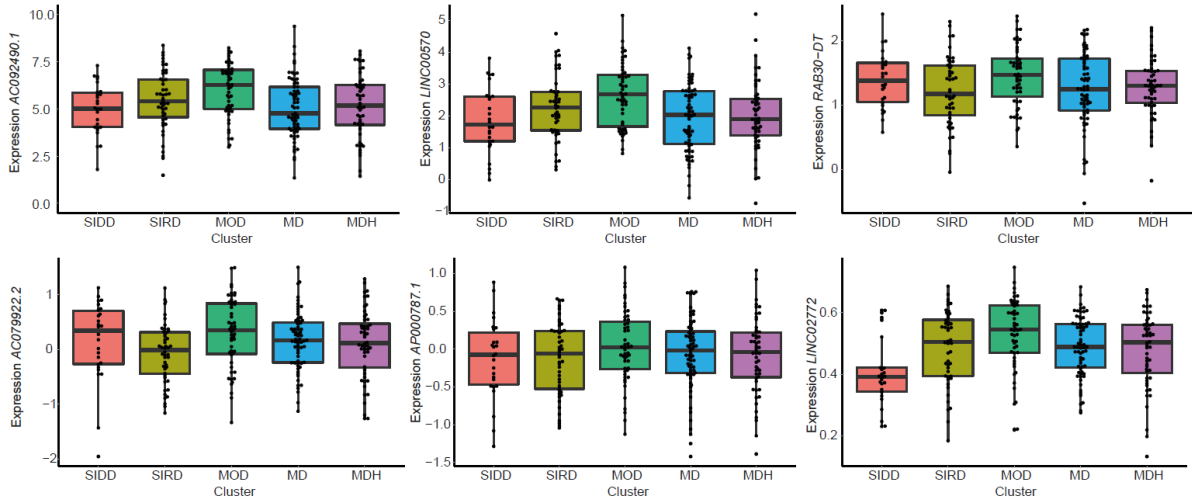

**ESM Fig. 3 Upregulated long non-coding RNAs in the MOD cluster.** Top six upregulated long non-coding RNAs in the MOD cluster compared to the other clusters. Long non-coding RNA *AC092490.1*, *LINC00570*, *RAB30-DT*, *AC079922.2*, *AP000787.1*, *LINC02772*.

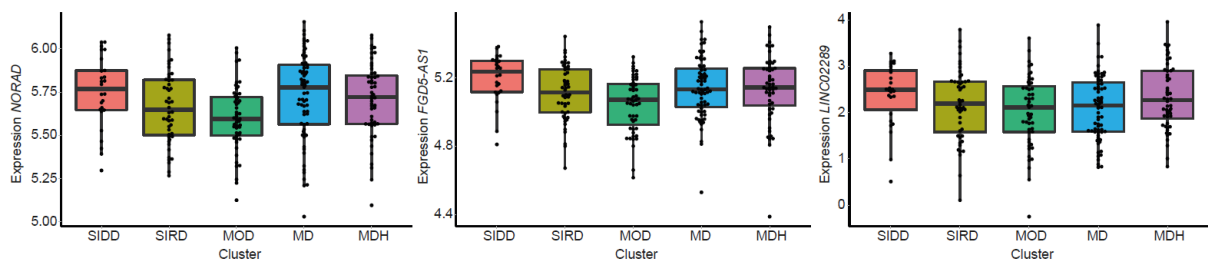

**ESM Fig. 4 Downregulated long non-coding RNAs in the MOD cluster.** Downregulated long non-coding RNAs in the MOD cluster compared to the other clusters. Long non-coding RNA *NORAD*, *FGD5-AS1* and *LINC02289* can be seen.

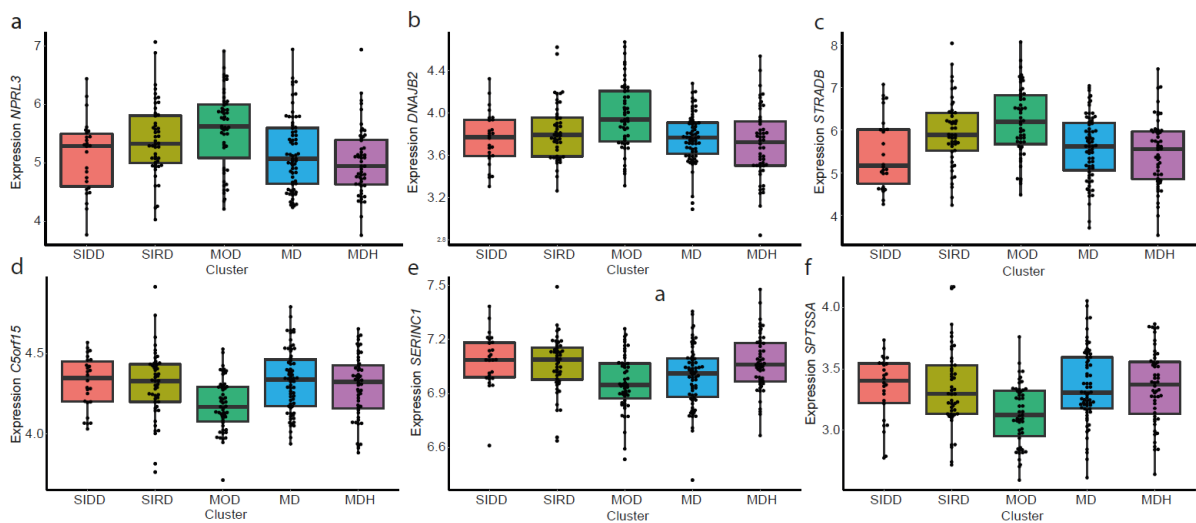

**ESM Fig. 5 Differentially expressed mRNAs in the MOD cluster.** **A, B and C** top three upregulated mRNAs in the MOD cluster compared to the other clusters: *NPRL3*, *DNAJB2* and *STRADB*. **D, E and F** top three downregulated mRNAs in the MOD cluster compared to the other clusters: *C5orf15*, *SERINC1* and *SPTSSA*.

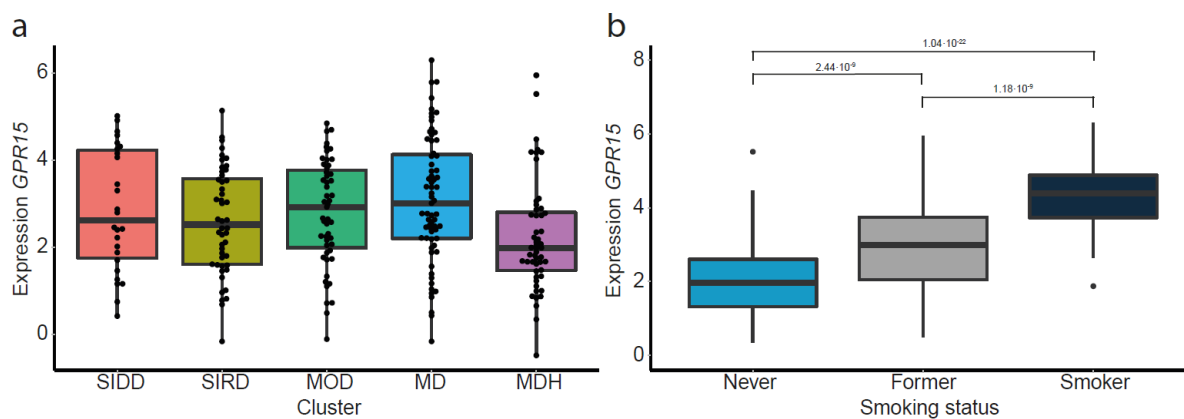

**ESM Fig. 6 Plot of the expression of *GPR15* against cluster and smoking status.**

A. Expression of *GPR15* against cluster: SIDD, SIRD, MOD, MD and MDH. B. Expression of *GPR15* against smoking status: never, former and smoker. Adjusted P-values are visible.

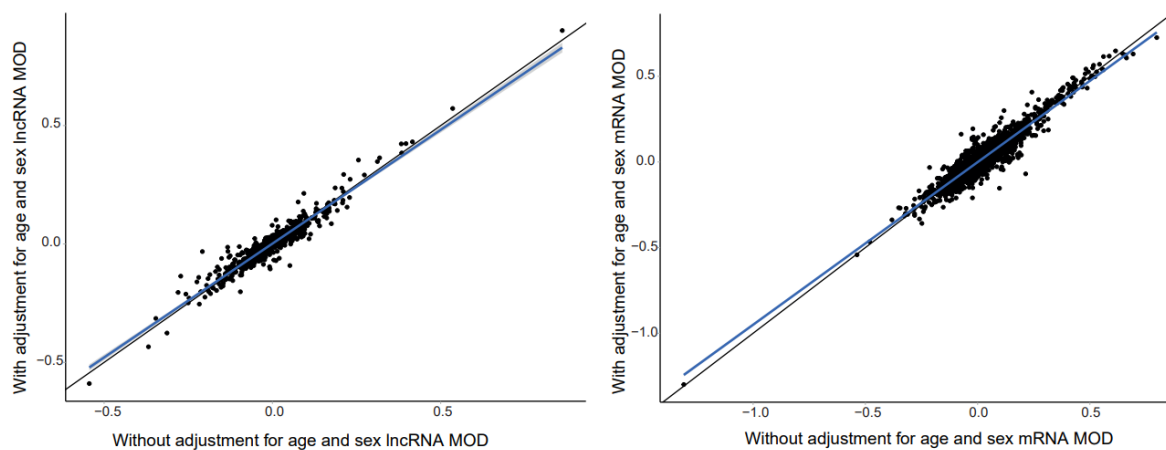

**ESM Fig. 7 Adjustment for age and sex**

Adjustment for age and sex resulted in similar differentially expressed lncRNAs and mRNAs in the MOD cluster

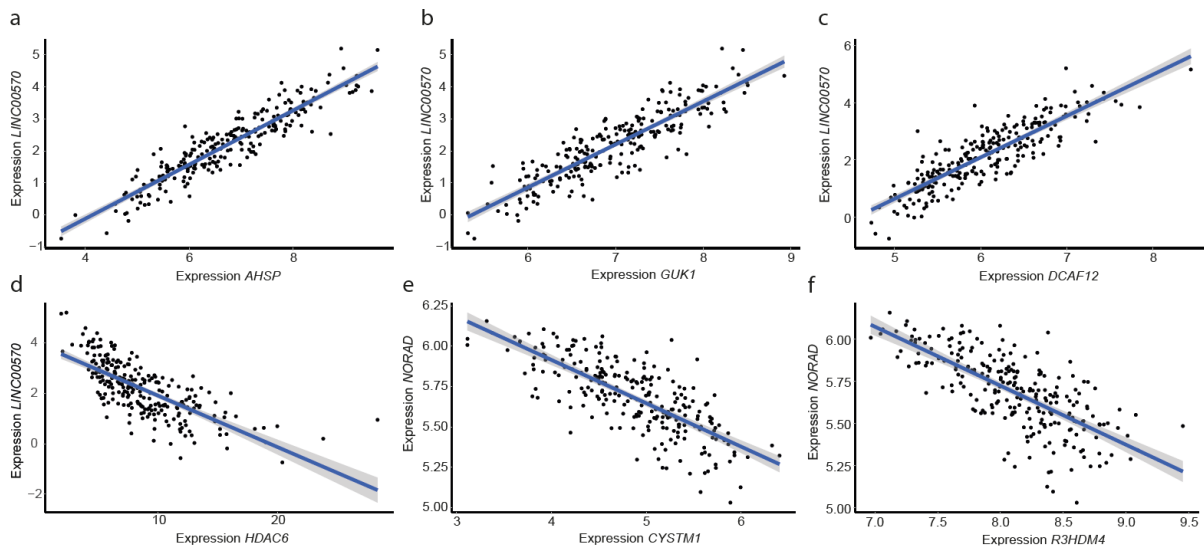

**ESM Fig. 8 Scatterplot expression of the top three positive and three negative correlated lncRNAs and mRNAs.** **A.** correlation *LINC00570* and *AHSP*. Spearman correlation coefficients 0.925. **B.** Correlation *LINC00570* and *GUK1*. Spearman correlation coefficients 0.880. **C.** correlation *LINC00570* and *DCAF12*. Spearman correlation coefficients 0.854. **D.** correlation *LINC00570* and *HDAC6*. Spearman correlation coefficients -0.761. **E.** correlation *NORAD* and *CYSTM1*. Spearman correlation coefficients -0.755. **F.** correlation *NORAD* and *R3HDM4*. Spearman correlation coefficients -0.738.

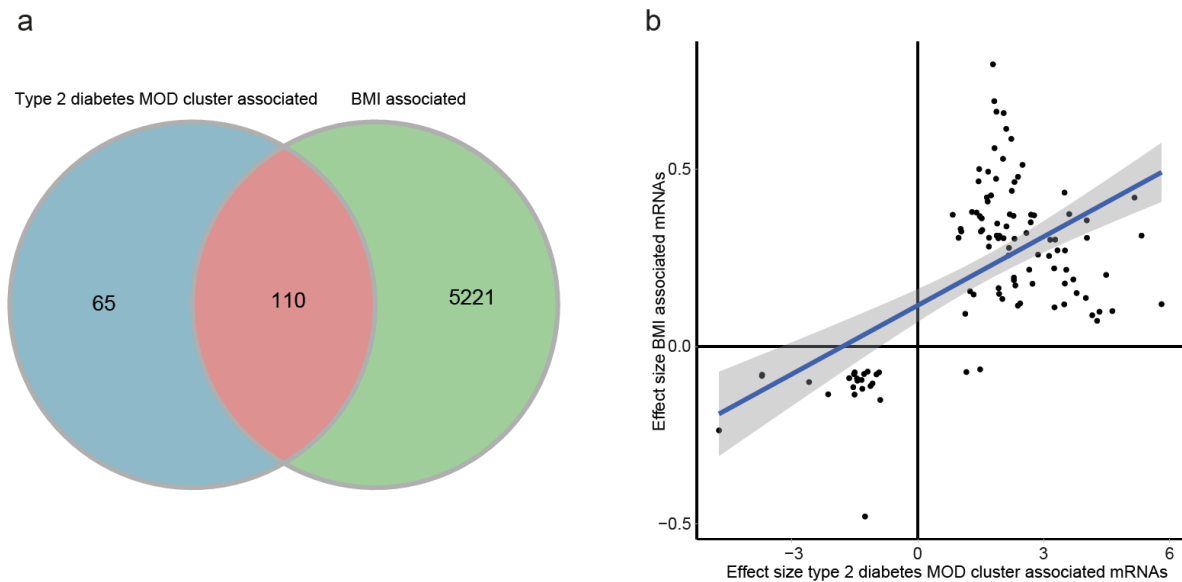

**ESM Fig. 9 Overlap mRNAs type 2 diabetes MOD cluster and BMI associated.** **A.** Venn diagram of overlapping mRNAs between type 2 diabetes MOD cluster and BMI associated. **B.** Effect size plot of 110 overlapping mRNAs.

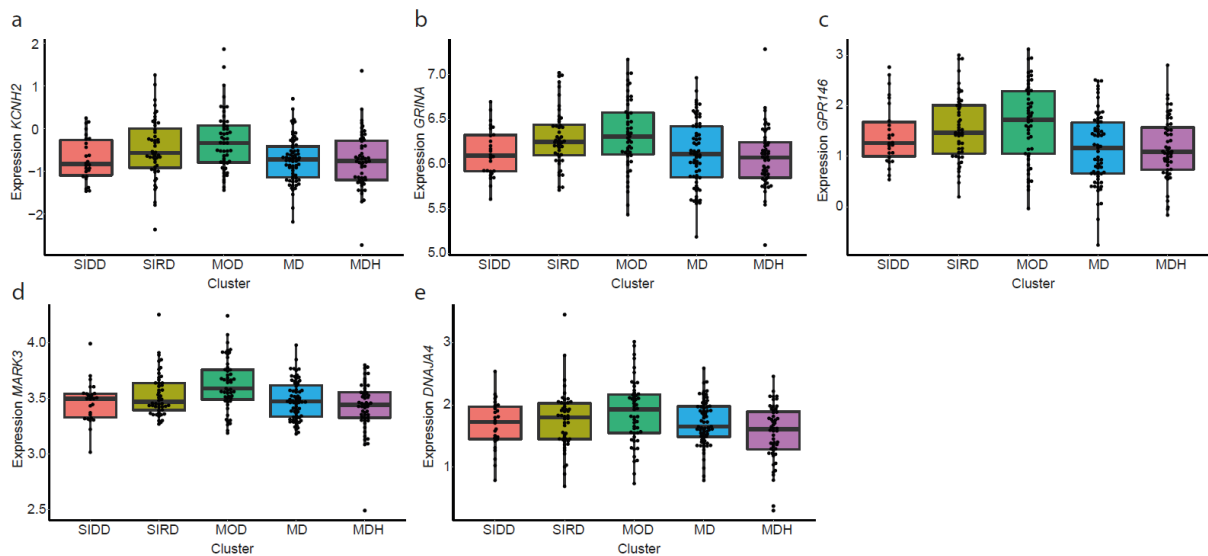

**ESM Fig. 10 Upregulated mRNAs in the MOD cluster.** A. Upregulated mRNA *KCNH2* in the MOD cluster. B. Upregulated mRNA *GRINA* in the MOD cluster. C. Upregulated mRNA *GPR146* in the MOD cluster. D. Upregulated mRNA *MARK3* in the MOD cluster. E. Upregulated mRNA *DNAJA4* in the MOD cluster.

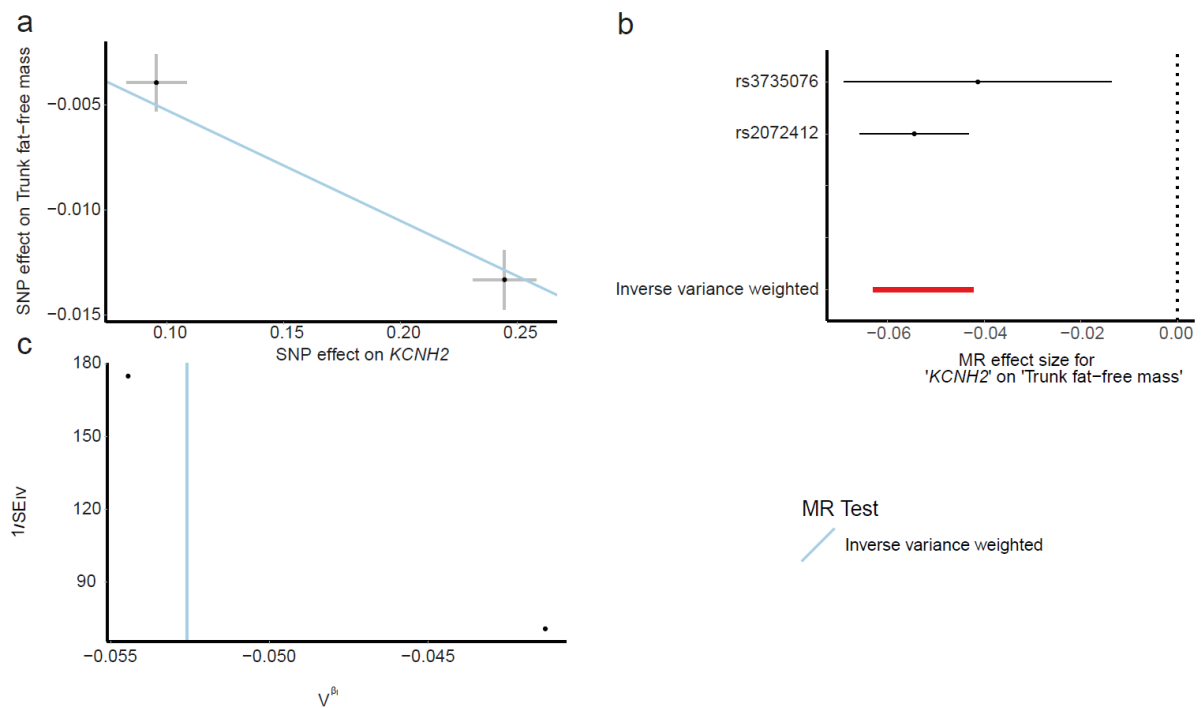

**ESM Fig. 11 Plots MR base results *KCNH2* on trunk fat-free mass.** A. Scatterplot of SNP effect *KCNH2*. B. Forest plot of MR effect size *KCNH2* on trunk fat-free mass. C. Funnel plot for distribution of instruments.

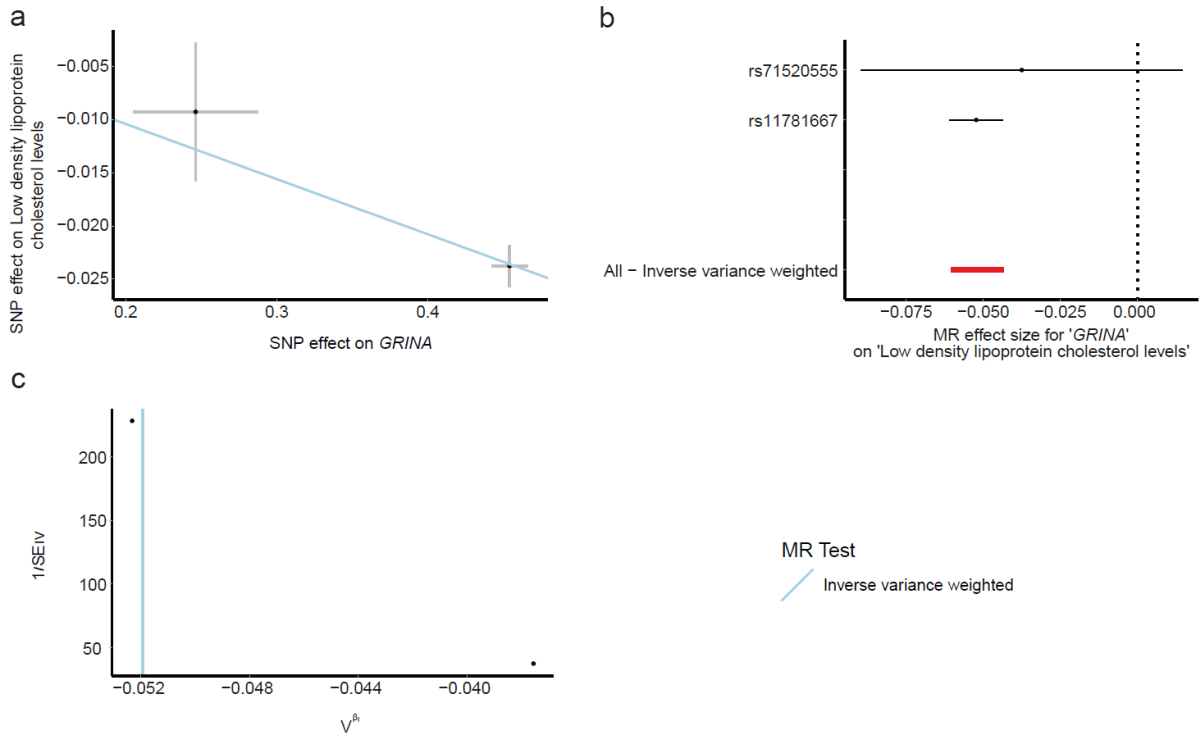

**ESM Fig. 12** Plots MR base results *GRINA* on LDL-cholesterol. **A.** Scatterplot of SNP effect *GRINA*. **B.** Forest plot of MR effect size *GRINA* on LDL-cholesterol. **C.** Funnel plot for distribution of instruments.

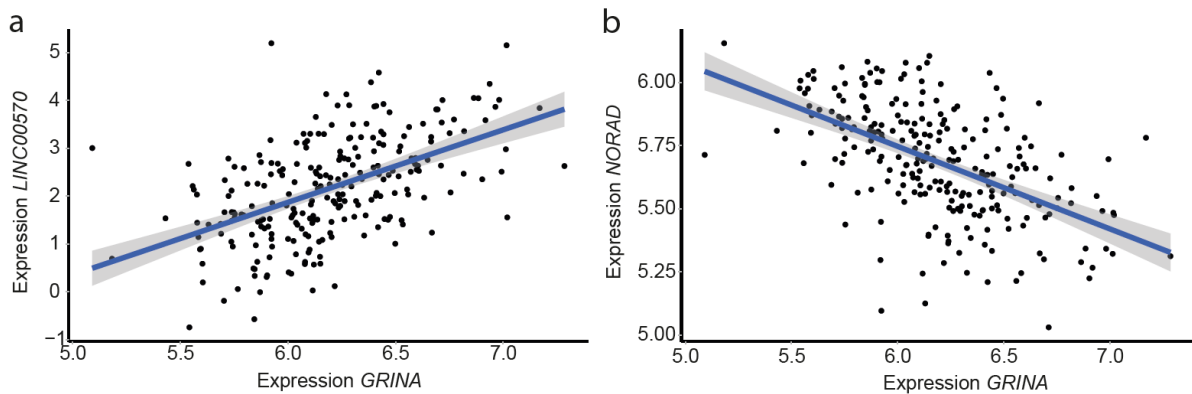

**ESM Fig. 13** Scatterplot of expression *GRINA* versus *LINC00570* and *NORAD*.

**A.** Scatterplot of expression *GRINA* versus *LINC00570*. Spearman correlation coefficients 0.536. **B.** Scatterplot of expression *GRINA* versus *NORAD*. Spearman correlation coefficients -0.569.

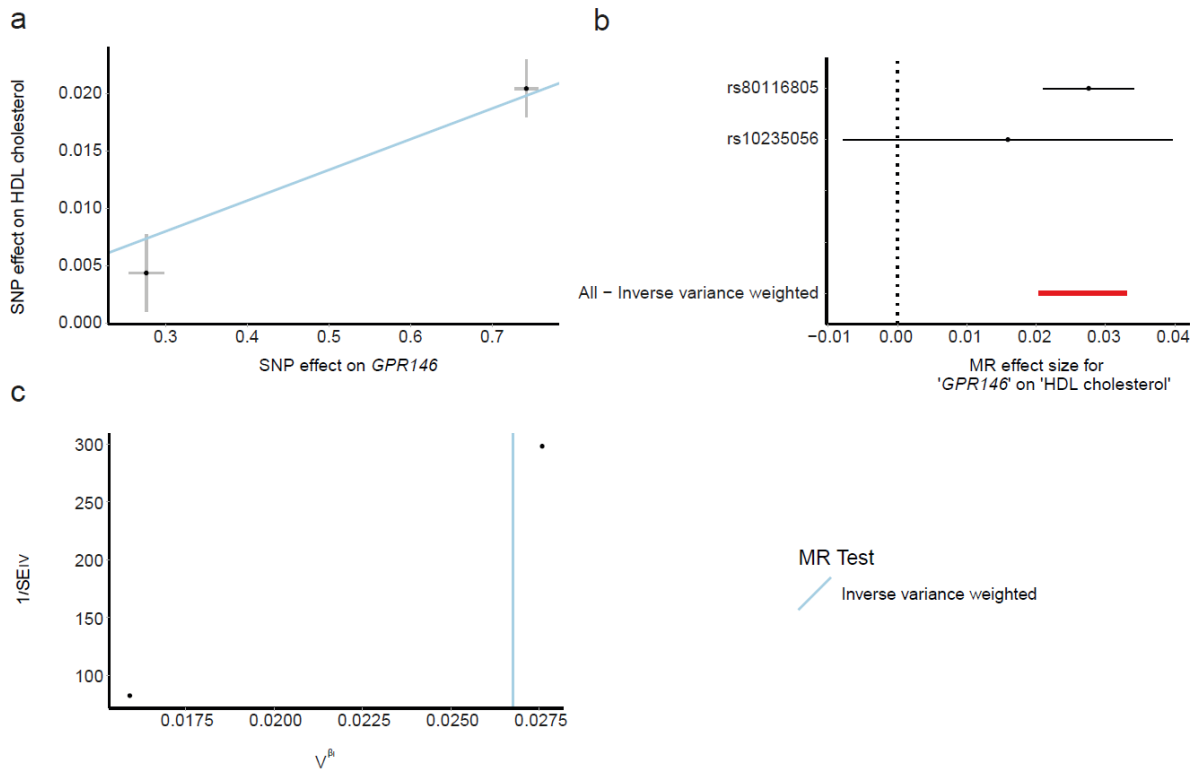

**ESM Fig. 14 Plots MR base results *GPR146* on HDL-cholesterol. A.** Scatterplot of SNP effect *GPR146*. **B.** Forest plot of MR effect size *GPR146* on HDL-cholesterol. **C.** Funnel plot for distribution of instruments.

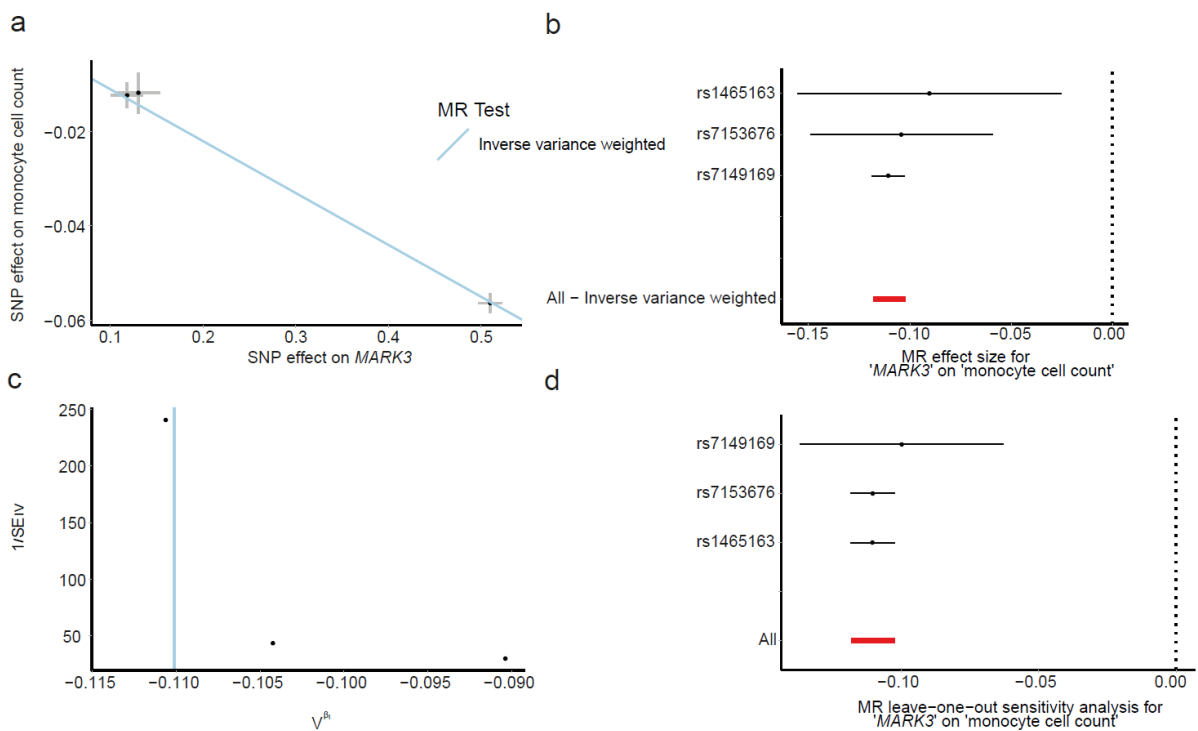

**ESM Fig. 15. Scatter plot and Forest plot of MR base results *MARK3* on monocyte cell count. A.** Scatterplot of SNP effect *MARK3*. **B.** Forest plot of MR effect size *MARK3* on monocyte cell count. **C.** Funnel plot for distribution of instruments. **D.** Leave one out plot.

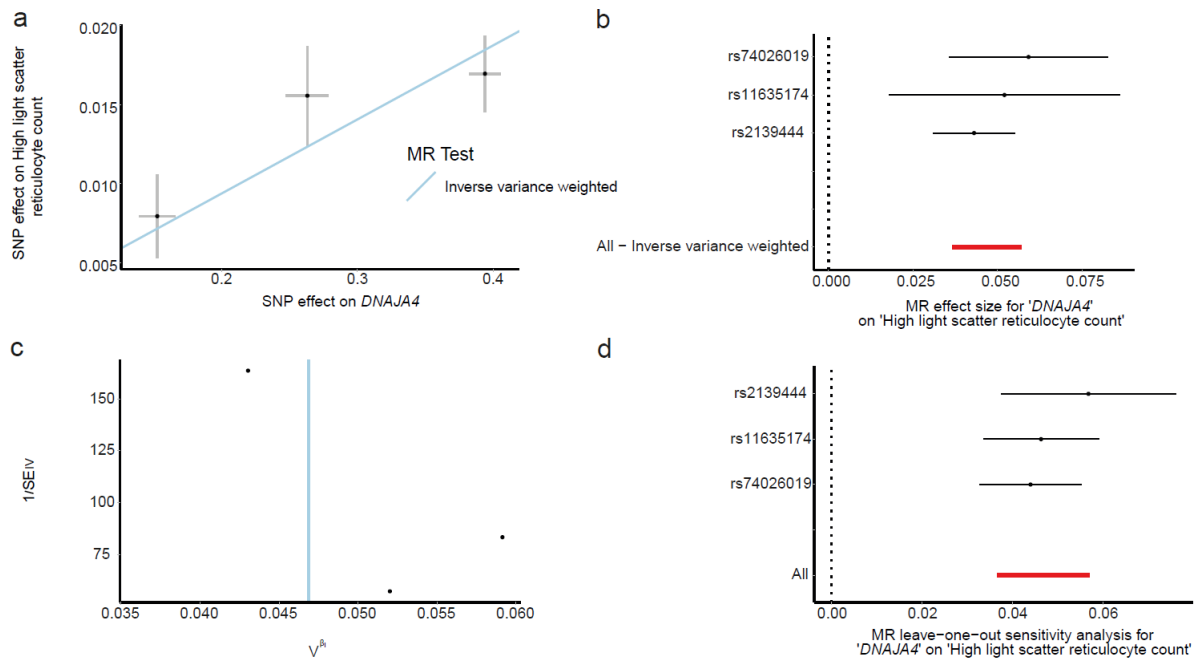

**ESM Fig. 16 Scatter plot and Forest plot of MR base results *DNAJA4* on reticulocyte count. A.** Scatterplot of SNP effect *DNAJA4*. **B.** Forest plot of MR effect size *DNAJA4* on reticulocyte count. **C.** Funnel plot for distribution of instruments. **D.** Leave one out plot.
